# Supplementary material for: Sweet Scents: Nectar Specialist Yeasts Enhance Nectar Attraction of a Generalist Aphid Parasitoid Without Affecting Survival
Source: Front Plant Sci. 2018 Jul 16;9:1009. doi: 10.3389/fpls.2018.01009 (PMC6055026; doi:10.3389/fpls.2018.01009)
Supplement: Supplementary file 1 [file Data_Sheet_1.xlsx]

## Sheet: Sheet1
Table S2. Raw data for the chemical profiles of synthetic nectar inoculated with various nectar-inhabiting yeasts.
Category	Class	Compound	Unit	Biol repl.	Tech repl.	Nectar-inhabiting yeasts
						Control	Y182	A.p.	H.u.	M.g.	M.r.	S.r.
Acidity		Acidity	pH	1	1	5.78089	4.05541	4.21616	4.5335	5.09773	4.48446	4.30556
			pH		2	5.74391	4.09847	4.2161	4.53373	5.0887	4.51682	4.33012
			pH	2	1	5.55888	4.02135	3.5812	5.35296	5.05393	4.41484	4.35488
			pH		2	5.76321	4.08597	3.63742	5.35067	5.07732	4.49027	4.29707
Acids		Acetic acid	mg/l	1	1	0.00321	0.16871	0.00878	0.01993	0.02335	0.04579	0.01984
			mg/l		2	0.00353	0.15642	0.00892	0.01929	0.02097	0.03354	0.02974
			mg/l	2	1	0.00487	0.15987	0.00798	0.01882	0.02897	0.03796	0.07698
			mg/l		2	0.00519	0.12241	0.00681	0.01536	0.01999	0.03965	0.06291
		D-Lactic acid	mg/l	1	1	1.6668	5.20187	2.06246	1.6358	1.25154	1.03383	1.72331
			mg/l		2	0.60576	14.0593	3.6629	1.43582	1.05146	1.00268	1.99024
			mg/l	2	1	1.46805	14.7954	2.08383	1.34187	1.33593	1.41947	1.82138
			mg/l		2	1.61804	11.5742	2.49879	1.44176	1.39505	1.48058	2.86594
Amino acids	Acidic & their amides	Aspartic acid	mmol/l	1	1	225.46	24.96	289.98	228.78	252.54	295.46	274.56
			mmol/l		2	214.1	26.96	290.34	179.88	184.32	251.48	239.88
			mmol/l	2	1	248.88	21.74	312.24	259.38	252.32	193.7	339.34
			mmol/l		2	250.48	19.74	229.1	129.32	167.9	203.6	197.02
		Asparagine	mmol/l	1	1	0.36	2.14	1.41	0.52	1.78	1.42	0.74
			mmol/l		2	0.46	2.14	1.48	0.46	1.38	1.16	0.68
			mmol/l	2	1	0.46	2.03	1.64	0.64	1.52	1.21	0.88
			mmol/l		2	0.46	1.56	1.32	0.32	1.34	1.28	0.86
		Glutamic acid	mmol/l	1	1	356.02	15.4	361.6	395.88	393.68	396.82	494.2
			mmol/l		2	326.74	16.64	356.8	307.68	254	248.02	435.48
			mmol/l	2	1	407.62	16.54	381.66	440.5	366.48	332.84	570.98
			mmol/l		2	408.9	11.96	281.56	237.74	228.08	263.66	309.68
		Glutamine	mmol/l	1	1	0.18	14.64	7.94	6.28	2.9	3.18	3.2
			mmol/l		2	0.18	16.22	7.7	4.86	2.22	3.68	2.78
			mmol/l	2	1	0.32	14.88	7.54	3.76	1.36	1.72	5.9
			mmol/l		2	0.34	13.32	5.3	2.68	1.06	2.82	4.54
	Aliphatic	Alanine	mmol/l	1	1	93.62	155.54	137.84	144.48	88.64	118.12	132.98
			mmol/l		2	80.26	172.64	135.24	110.62	53.14	74.28	115.18
			mmol/l	2	1	109.12	173.34	150.62	137.04	76.44	98.96	180.04
			mmol/l		2	105.3	110.92	110.82	74.26	45.44	78.44	92.06
		Arginine	mmol/l	1	1	36.54	0.26	24.9	31.88	45.38	45.94	29.14
			mmol/l		2	32.78	0.24	20.26	25.36	27.78	28.48	25.74
			mmol/l	2	1	38.24	0.72	15.88	33	42.12	39.24	14.46
			mmol/l		2	40.21	0.12	8.2	14.02	25.26	31.08	6.26
		Glycine	mmol/l	1	1	59.78	66.9	69.46	68.56	64.14	73.34	73.52
			mmol/l		2	50.08	71.98	66.71	51.56	57.02	62.56	64.38
			mmol/l	2	1	67.5	75.78	68.26	71.98	37.08	46.46	72.81
			mmol/l		2	66.34	47.34	52.18	45.64	34.12	49.94	68.78
		Iso-Leucine	mmol/l	1	1	54.5	63.54	67.42	94.08	56.62	67.6	73.98
			mmol/l		2	55.28	74.44	66.84	74.88	40.86	42.1	63.32
			mmol/l	2	1	63.88	64.4	70.62	91.14	55.72	54.8	70.4
			mmol/l		2	66.78	48.5	51.96	57.72	34.1	46.26	38.7
		Leucine	mmol/l	1	1	96.74	96.82	119.84	140.28	108.98	117.42	134.42
			mmol/l		2	85.86	108.8	115.56	108.54	63.92	71.76	116.14
			mmol/l	2	1	113.32	105.36	124.16	147.28	97.94	99.04	134.04
			mmol/l		2	112.94	68.94	90.24	82.86	56.86	77.06	69.74
		Valine	mmol/l	1	1	97.44	157.4	129.28	177.4	107.12	129.1	136.12
			mmol/l		2	96.5	174.18	131.14	137.14	107.06	110.86	118.26
			mmol/l	2	1	111.3	150.1	140.86	173.24	76.64	84.02	133.94
			mmol/l		2	117.02	114.4	103.82	109.88	69.86	90.7	76.46
	Aromatic	Phenylalanine	mmol/l	1	1	52.45	67.42	69.46	69.92	52.38	55.54	68.5
			mmol/l		2	46	69.2	70.1	55.68	32.54	36.6	62.92
			mmol/l	2	1	58.24	63.48	78	74.94	47.32	52.94	76.82
			mmol/l		2	57.8	43.92	56.24	45.7	30.58	37.68	44.66
		Tyrosine	mmol/l	1	1	28.32	37.2	37.68	44.82	32.76	40.08	40.34
			mmol/l		2	26.54	40.78	38.22	35.92	21.58	25.2	35.12
			mmol/l	2	1	33.2	38.02	40.21	51.32	30.92	32.24	43.18
			mmol/l		2	33.58	26.52	29.58	31.74	19.38	25.76	24.18
	Basic	Histidine	mmol/l	1	1	22.94	9.91	25.88	35.42	29.86	27.62	33.01
			mmol/l		2	21.22	9.72	24.14	27.44	26.64	25.08	29.16
			mmol/l	2	1	26.08	10.28	23.74	37.7	18.12	17.18	27.06
			mmol/l		2	26.04	12.91	15.48	23.6	16.56	20.24	24.38
		Lysine	mmol/l	1	1	98.42	47.44	70.36	135.34	145.2	145.74	141.36
			mmol/l		2	89.41	54.52	68.26	109.74	79.44	83.46	123.22
			mmol/l	2	1	122.08	67.52	64.02	156.4	132.2	117.24	142.58
			mmol/l		2	117.72	37.98	56.02	85.86	72.28	89.68	74.36
	Containing OH group	Serine	mmol/l	1	1	113.72	127.3	98.98	74.58	87.48	107.52	112.88
			mmol/l		2	99.72	142.78	96.88	73.56	75.5	92.9	151.36
			mmol/l	2	1	130.98	141.24	86.72	57.24	53.12	67.46	98.18
			mmol/l		2	128.98	91.94	78.04	58.56	45.54	73.72	79.88
		Threonine	mmol/l	1	1	71.36	86.04	101.48	97.14	54.48	67.54	89.36
			mmol/l		2	67.26	82.56	98.76	75.24	49.62	58.88	78.46
			mmol/l	2	1	81.44	75.24	95.18	93.64	36.52	43.78	93.72
			mmol/l		2	83.4	56.26	79.06	57.36	31.64	47.76	53.28
	Containing sulphur	Methionine	mmol/l	1	1	37.51	27.66	26.08	57.67	34.64	35.26	44.32
			mmol/l		2	34.28	30.62	27.08	44.28	21.64	30.02	38.92
			mmol/l	2	1	42.48	28.74	32.82	56.54	30.76	22.12	35.16
			mmol/l		2	42.31	19.22	24.73	36.82	18.87	24.04	18.96
MVOCs	Alcohol	2-Methyl propanol	mg/l	1	1	0	23.1717	3.0733	0.0829844	0.0150304	0.444714	0.0309536
			mg/l		2	0	20.5757	2.91043	0.075762	0.0514102	0.353044	0.0832874
			mg/l	2	1	0	22.0926	4.30741	0.0268156	0.0545096	0.424706	0.0191296
			mg/l		2	0	23.1124	3.85605	0.0450912	0.0313296	0.34565	0.0094428
		3-Methyl-1-butanol	mg/l	1	1	0	5.66834	1.02478	0.189588	0.819742	2.03269	0.0641964
			mg/l		2	0	6.7515	0.976537	0.182097	0.585356	1.67099	0.0650748
			mg/l	2	1	0	5.01696	1.41037	0.138299	1.19172	1.84903	0.0861808
			mg/l		2	0	5.78833	1.27553	0.158429	1.00745	1.55404	0.0767624
		2-Phenyl ethanol	mg/l	1	1	0	1.34041	0.38717	1.0043	3.29554	0.498297	0.18117
			mg/l		2	0	1.20697	0.27527	0.504324	1.81965	0.441542	0.0310612
			mg/l	2	1	0	1.44456	0.31193	0	0.788413	0.280893	0.27926
			mg/l		2	0	1.8533	0.29601	0	0.667389	0.34597	0.3198
	Aldehyde	Acetaldehyde	mg/l	1	1	0.02196	20.1953	3.99299	0.295167	0.0671	0.532262	0.01403
			mg/l		2	0.011235	26.1555	3.77617	0.299168	0.038552	0.415142	0.0134932
			mg/l	2	1	0.0239852	20.1079	5.30393	0.181341	0.102187	0.496808	0.050264
			mg/l		2	0.0123541	21.4913	4.60648	0.27289	0.0691984	0.422071	0.0371124
	Ester	Amyl acetate	mg/l	1	1	0	0.00667	0	0	0.0089792	0	0
			mg/l		2	0	0.00557	0	0	0.0082716	0	0
			mg/l	2	1	0	0.00701	0	0	0.0079624	0	0
			mg/l		2	0	0.006	0	0	0	0	0
		Ethyl acetate	mg/l	1	1	0	0.06454	0	0.13442	0	0	0.0133468
			mg/l		2	0	0.08045	0.0052704	0.131004	0	0	0.0612794
			mg/l	2	1	0	0.07311	0	0.0520208	0	0	0.038552
			mg/l		2	0	0.08751	0	0.0654408	0	0.0061244	0.0248392
		Isoamyl acetate	mg/l	1	1	0	0.087352	0	0	0	0	0
			mg/l		2	0	0.100967	0	0	0	0	0
			mg/l	2	1	0	0.081984	0	0	0	0	0
			mg/l		2	0	0.0640744	0	0	0	0	0
		Propyl acetate	mg/l	1	1	0	0.0350872	0	0.0107848	0	0	0.020374
			mg/l		2	0	0.0407968	0	0.0111508	0	0	0.023424
			mg/l	2	1	0	0.03599	0	0.0057096	0	0	0.0155916
			mg/l		2	0	0.0291336	0	0.0077348	0	0	0.0109556
		Isobutyl acetate	mg/l	1	1	0	0.0226188	0	0	0	0	0
			mg/l		2	0	0.0266448	0	0	0	0	0
			mg/l	2	1	0	0.0208864	0	0	0	0	0
			mg/l		2	0	0.0163236	0	0	0	0	0
		Ethyl butyrate	mg/l	1	1	0	0.047458	0.11773	0	0	0.0147132	0
			mg/l		2	0	0.0572424	0.111215	0	0	0.0106872	0
			mg/l	2	1	0	0.0447252	0.128515	0	0	0.0115168	0
			mg/l		2	0	0.0410896	0.114948	0	0	0.0086132	0
		Ethyl propionate	mg/l	1	1	0	0.0362828	0	0	0	0	0
			mg/l		2	0	0.0412848	0	0	0	0	0
			mg/l	2	1	0	0.0441152	0	0	0	0	0
			mg/l		2	0	0.031842	0	0	0	0	0
	Containing sulphur	Dimethyl disulfide	μg/l	1	1	0	1.22051	0	0	0	0	0
			μg/l		2	0	0.90278	0	0	0	0	0
			μg/l	2	1	0	0.77122	0	0	0	0	0.07458
			μg/l		2	0	1.25402	0	0	0	0	0
		Methanethiol	μg/l	1	1	0	0.24902	0.24272	0.1809	0.17214	0.22441	0.16698
			μg/l		2	0	0.25758	0.2087	0.16244	0.18294	0.20069	0.20808
			μg/l	2	1	0	0.2837	0.21671	0.28756	0.21354	1.59709	0.22882
			μg/l		2	0	0.38872	0.30149	0.27885	0.27083	0.22326	0.23437
Sugars	Monosaccharide	Glucose	mmol/l	1	1	5.29249	191.379	320.017	31.61	21.2267	24.6356	40.3958
			mmol/l		2	4.56129	236.905	289.972	19.9922	14.1671	13.6251	29.4718
			mmol/l	2	1	4.77548	231.183	370.852	35.1187	23.7582	20.1428	74.9122
			mmol/l		2	5.09525	175.268	274.173	16.7693	12.2913	17.6128	37.54
		Fructose	mmol/l	1	1	3.57913	206.47	70.2157	32.0855	21.4236	28.1351	43.9103
			mmol/l		2	4.32542	273.351	59.557	20.332	15.0193	14.3029	28.646
			mmol/l	2	1	3.86533	238.29	79.7288	35.3281	24.336	22.1513	74.6913
			mmol/l		2	4.01257	180.181	62.5993	18.9729	14.2431	20.0731	36.2618
	Disaccharide	Sucrose	mmol/l	1	1	366.114	249.082	48.5131	559.736	471.656	506.891	474.94
			mmol/l		2	508.425	335.175	43.4836	402.133	319.775	341.16	392.689
			mmol/l	2	1	437.269	313.409	53.2756	597.272	512.343	447.609	508.797
			mmol/l		2	424.198	249.435	37.976	361.014	308.631	392.215	301.863
Sulphur		Sulphur dioxide	mg/l	1	1	0.04326	0.28874	0.13288	0.06974	0.13116	0.09629	0.20586
			mg/l		2	0.05376	0.26874	0.16909	0.06531	0.13338	0.13912	0.15926
			mg/l	2	1	0.04497	0.26074	0.17142	0.07801	0.20696	0.14289	0.23814
			mg/l		2	0.05561	0.33541	0.17081	0.05601	0.15578	0.11269	0.31838
